# Supplementary material
Source: PubMed Central journal article supplement (PMC9378531)
Supplement: NIHMS1801957-supplement-2.pdf [file NIHMS1801957-supplement-2.pdf]

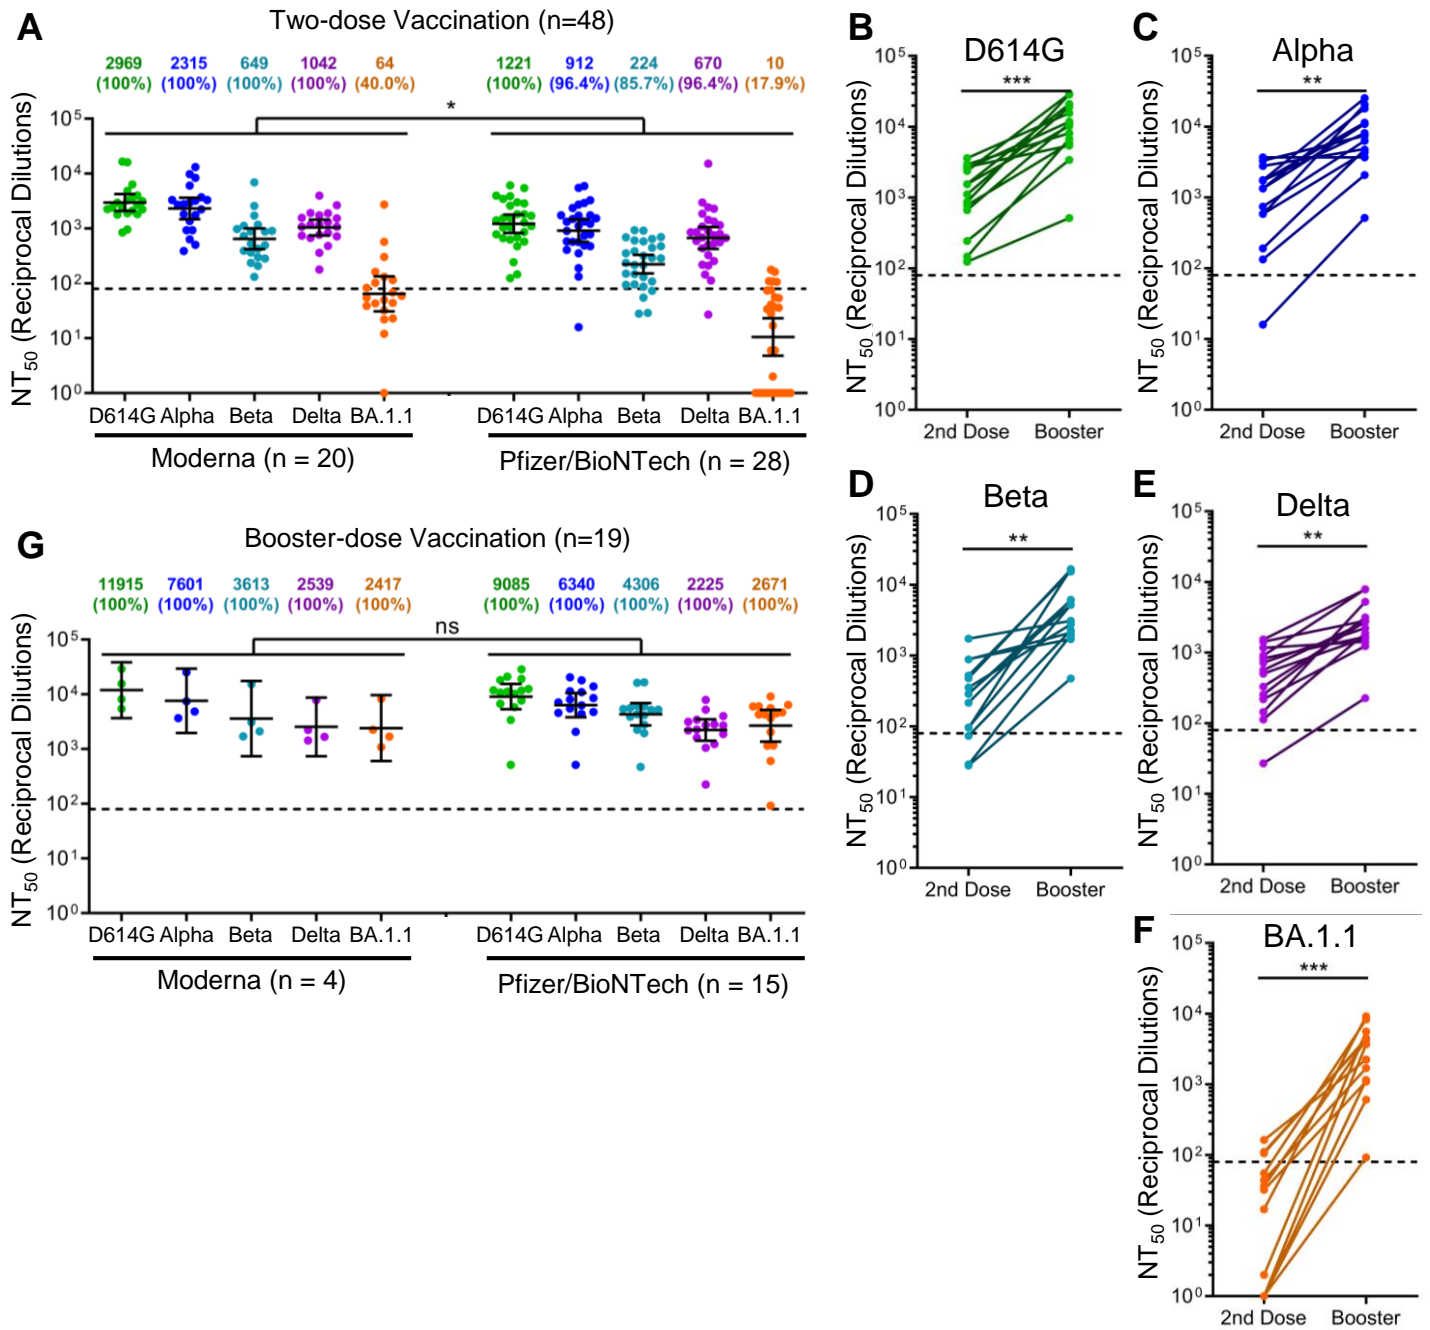

**Figure S1: Omicron resistance to two-dose and booster immunity varies by individual and vaccine type, related to Figure 1.** (A)  $NT_{50}$  values for HCWs who received two doses of Moderna mRNA-1273 (n = 20) or Pfizer/BioNTech BNT162b2 (n = 28) are plotted by vaccine type. (B-F) Post-second vaccine dose and post-booster dose  $NT_{50}$  values are plotted pairwise for HCWs for which both time points were analyzed (n = 14) against the D614G (C), Alpha (D), Beta (E), Delta (F), and Omicron BA.1.1 (G) variants. (H)  $NT_{50}$  values for recipients of Moderna mRNA-1273 (n = 4) or Pfizer/BioNTech BNT162b2 (n = 15) booster doses are plotted by vaccine type. Geometric mean  $NT_{50}$  values in panels A and G are displayed at the top of plots along with the percentage of subjects with  $NT_{50}$  values above the limit of detection; bars represent geometric mean  $\pm$  95% confidence interval, and for A and G significance is determined by one-way repeated measures ANOVA with Bonferroni's multiple testing correction while for B-F, significance was determined by two-tailed paired t-test. P-values are represented as \* $p < 0.05$ , \*\* $p < 0.01$ , \*\*\* $p < 0.001$ ; ns, not significant.

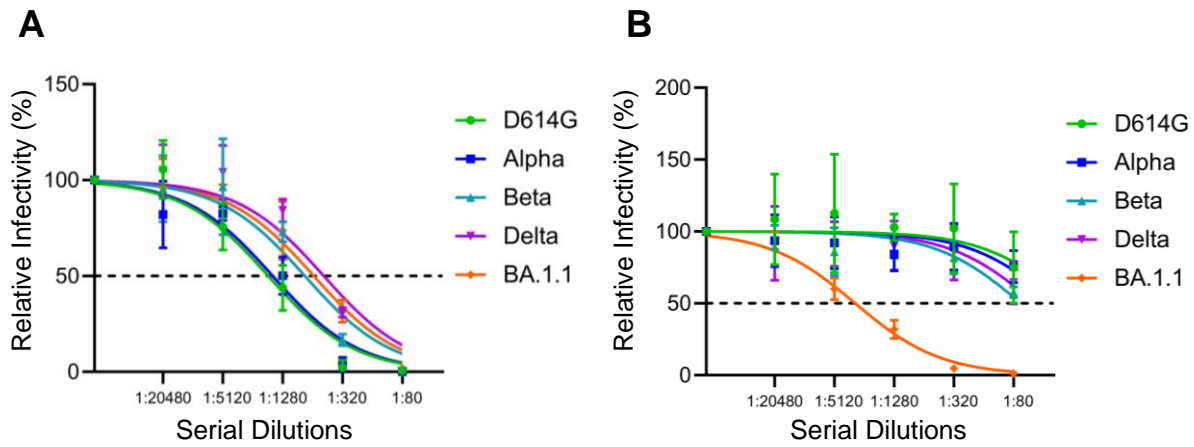

**Figure S2: Omicron patients exhibit heterogeneous breadth of neutralization, related to Figure 2. (A-B)** Representative neutralization curves are shown for two Omicron-wave COVID-19 hospitalized patient are displayed, including one with a broad nAb repertoire (A) and one with an Omicron-specific nAb repertoire (B).

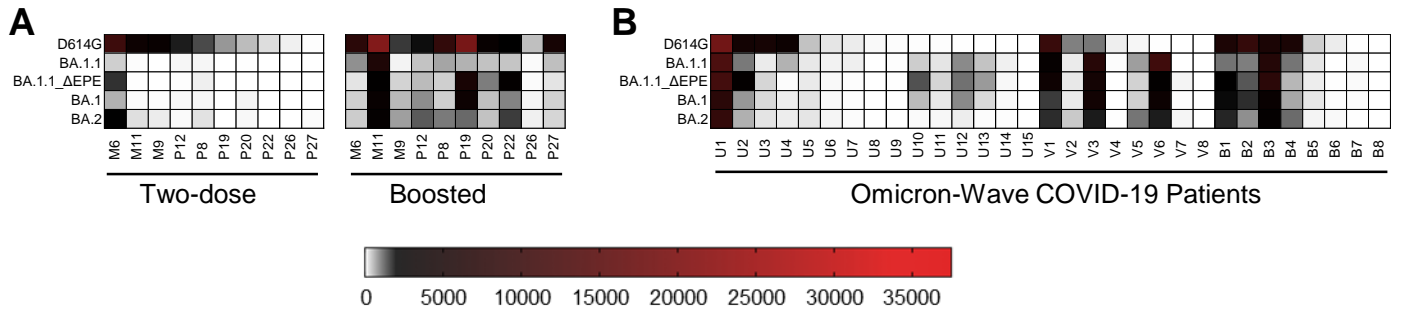

**Figure S3: Omicron sub-lineage escape from Omicron infected patient sera varies by vaccination status, related to Figure 3. (A-B)** Heat maps showing patient/HCW NT<sub>50</sub> values against each Omicron sub-lineage. **(A)** HCWs are identified as “M” for Moderna mRNA-1273 vaccinated/boosted HCW, “P” for Pfizer/BioNTech BNT162b2 vaccinated/boosted HCW. **(B)** Hospitalized patient samples collected during the Omicron-wave are identified as “U” for unvaccinated, “V” for 2-dose vaccinated, and “B” for booster dose vaccinated.
